# Supplementary material for: Assessment of causal relationships between omega-3 and omega-6 polyunsaturated fatty acids in bipolar disorder: a 2-sample bidirectional mendelian randomization study
Source: Royal Society of Chemistry journal article supplement (doi:10.1039/d3fo00265a), 2023-01-01
Supplement: d3fo00265a4.pdf [file d3fo00265a4.pdf]

## Supplementary Information

### Table of Contents

|                                                                                                                                                                |          |
|----------------------------------------------------------------------------------------------------------------------------------------------------------------|----------|
| <b>Supplemental methods</b> .....                                                                                                                              | <b>2</b> |
| Calculation of F-statistic and R <sup>2</sup> .....                                                                                                            | 2        |
| Calculation of MR power .....                                                                                                                                  | 2        |
| <b>Supplemental References</b> .....                                                                                                                           | <b>3</b> |
| <b>Supplemental Results</b> .....                                                                                                                              | <b>4</b> |
| Fig. S1. Causal relationship between exposure to bipolar disorder and outcomes in three fatty acid types. nSNP: number of SNPs. ....                           | 4        |
| Fig. S2. Leave one out test of the causal relationship between three fatty acid types and the risk of bipolar disorder. ....                                   | 5        |
| Table S1. Univariate Mendelian Randomization Harmonized Dataset and Strength Assessment of the Effects of Omega-3 Fatty Acids on Bipolar Disorder. ....        | 6        |
| Table S2. Univariate Mendelian Randomization Harmonized Dataset and Strength Assessment of the Effects of Omega-6 Fatty Acids on Bipolar Disorder. ....        | 10       |
| Table S3. Univariate Mendelian Randomization Harmonized Dataset and Strength Assessment of the Effects of Omega-6/Omega-3 Fatty Acids on Bipolar Disorder..... | 14       |
| Table S4. Calculate power statistics to reflect true cause and effect ( $P < 5e-8$ ).....                                                                      | 19       |

## Supplemental methods

### ***Calculation of F-statistic and R<sup>2</sup>***

Generally, we need an F statistic greater than 10 to effectively avoid bias caused by weak instrumental variables. F statistic, calculated as follows:

$$F = \frac{N - k - 1}{k} \times \frac{R^2}{1 - R^2}$$

N represents the amount of GWAS samples exposed, and R<sup>2</sup> represents the degree of exposure to IV explanations that are difficult to obtain directly, calculated as follows:

$$R^2 = 2 \times (1 - \text{MAF}) \times \text{MAF} \times \beta^2$$

Here MAF is the minor allele frequency,  $\beta$  is the size of the effect of SNP on exposure. Both MAF and  $\beta$  are directly available, and R<sup>2</sup> can be equivalent to the effector allele frequency (EAF)<sup>1</sup>.

### ***Calculation of MR power***

The statistical power can be calculated using the mRnd website <https://shiny.cnsgenomics.com/mRnd/>, which requires four data to calculate MR power: (1) proportion of cases in the (intended) study (case percentage, outcome). (2) Total sample size. (3) True odds ratio of the outcome variable per standard deviation of the exposure variable (MR's OR value). (4) Proportion of variance in exposure variable explained by SNPs.

## Supplemental References

1 N. Papadimitriou, N. Dimou, K. K. Tsilidis, B. Banbury, R. M. Martin, S. J. Lewis, N. Kazmi, T. M. Robinson, D. Albanes, K. Aleksandrova, S. I. Berndt, D. Timothy Bishop, H. Brenner, D. D. Buchanan, B. Bueno-de-Mesquita, P. T. Campbell, S. Castellví-Bel, A. T. Chan, J. Chang-Claude, M. Ellingjord-Dale, J. C. Figueiredo, S. J. Gallinger, G. G. Giles, E. Giovannucci, S. B. Gruber, A. Gsur, J. Hampe, H. Hampel, S. Harlid, T. A. Harrison, M. Hoffmeister, J. L. Hopper, L. Hsu, J. María Huerta, J. R. Huyghe, M. A. Jenkins, T. O. Keku, T. Kühn, C. La Vecchia, L. Le Marchand, C. I. Li, L. Li, A. Lindblom, N. M. Lindor, B. Lynch, S. D. Markowitz, G. Masala, A. M. May, R. Milne, E. Monninkhof, L. Moreno, V. Moreno, P. A. Newcomb, K. Offit, V. Perduca, P. D. P. Pharoah, E. A. Platz, J. D. Potter, G. Rennert, E. Riboli, M.-J. Sánchez, S. L. Schmit, R. E. Schoen, G. Severi, S. Sieri, M. L. Slattery, M. Song, C. M. Tangen, S. N. Thibodeau, R. C. Travis, A. Trichopoulou, C. M. Ulrich, F. J. B. van Duijnhoven, B. Van Guelpen, P. Vodicka, E. White, A. Wolk, M. O. Woods, A. H. Wu, U. Peters, M. J. Gunter and N. Murphy, Physical activity and risks of breast and colorectal cancer: a Mendelian randomisation analysis., *Nat. Commun.*, 2020, 11, 597.

## Supplemental Results

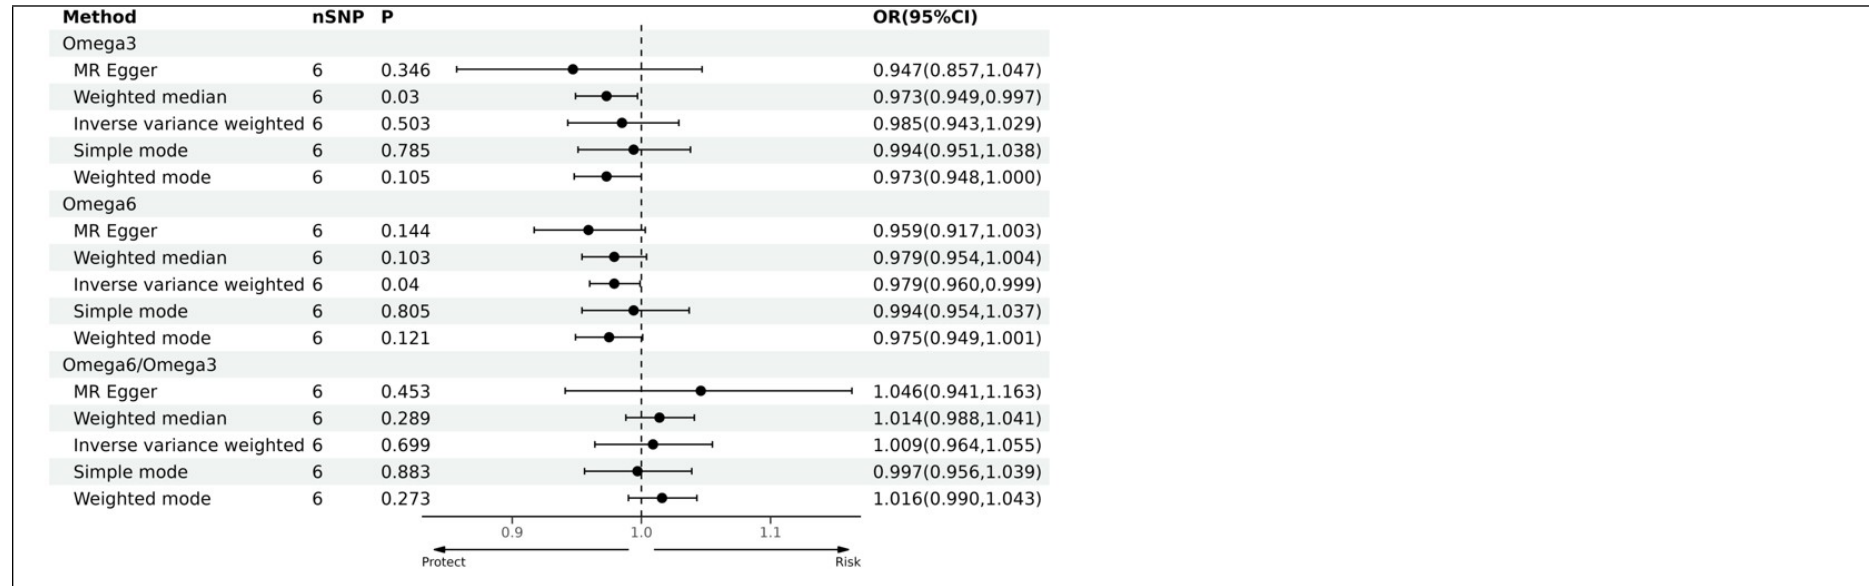

**Fig. S1.** Causal relationship between exposure to bipolar disorder and outcomes in three fatty acid types. nSNP: number of SNPs.

nSNP: number of SNPs; OR: odds ratio; CI: confidence interval.

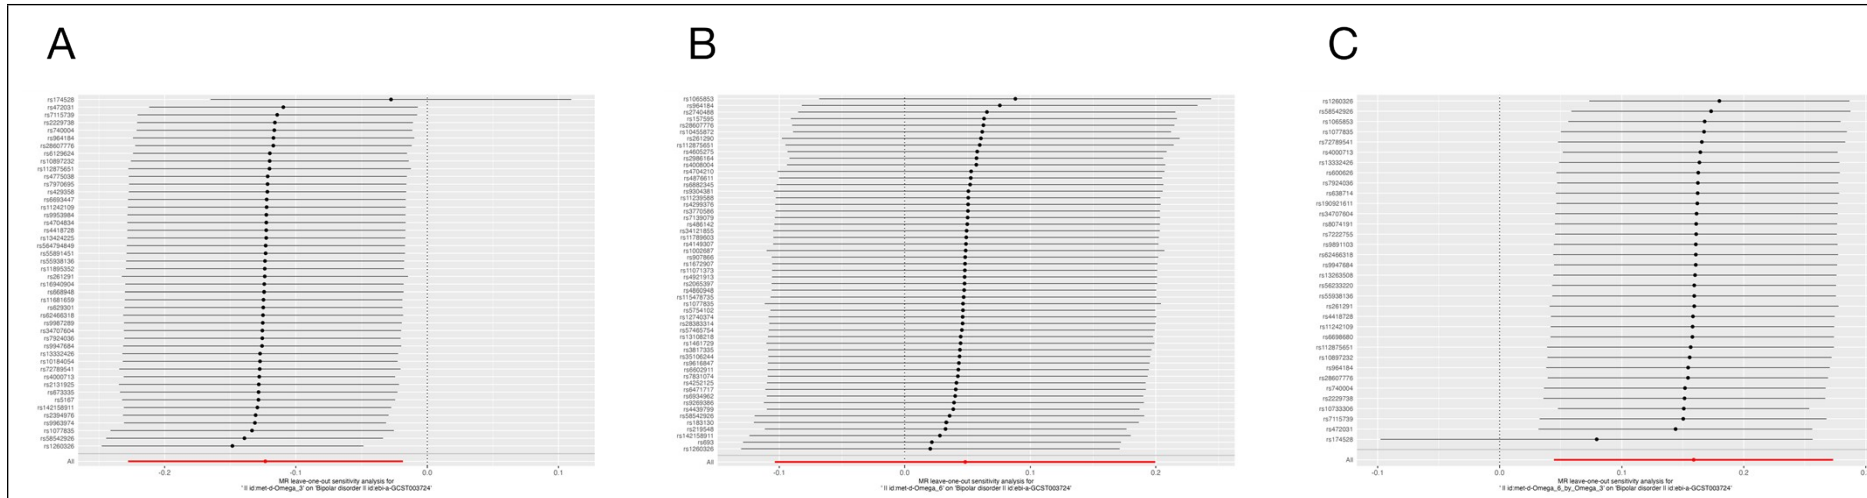

**Fig. S2.** Leave one out test of the causal relationship between three fatty acid types and the risk of bipolar disorder.

(A) Omega-3-Bipolar disorder. (B) Omega-6-Bipolar disorder. (C) Omega-6/ Omega-3-Bipolar disorder.

**Table S1.** Univariate Mendelian Randomization Harmonized Dataset and Strength Assessment of the Effects of Omega-3 Fatty Acids on Bipolar Disorder.

| SNP         | EA exposure | Other allele exposure | EA outcome | Other allele outcome | Chromosome | Exposure |       |           | Outcome |       |          | F       |
|-------------|-------------|-----------------------|------------|----------------------|------------|----------|-------|-----------|---------|-------|----------|---------|
|             |             |                       |            |                      |            | $\beta$  | SE    | <i>p</i>  | $\beta$ | SE    | <i>p</i> |         |
| rs10184054  | G           | C                     | G          | C                    | 2          | -0.036   | 0.005 | 5.60E-15  | -0.026  | 0.026 | 0.243    | 18.397  |
| rs1077835   | G           | A                     | G          | A                    | 15         | 0.126    | 0.005 | 1.80E-149 | 0.008   | 0.028 | 0.773    | 216.899 |
| rs10897232  | T           | C                     | T          | C                    | 11         | 0.048    | 0.005 | 2.50E-27  | -0.023  | 0.025 | 0.347    | 43.361  |
| rs11242109  | T           | G                     | T          | G                    | 5          | 0.024    | 0.004 | 2.40E-09  | -0.011  | 0.022 | 0.550    | 16.755  |
| rs112875651 | A           | G                     | A          | G                    | 8          | -0.087   | 0.004 | 3.50E-98  | 0.018   | 0.023 | 0.339    | 196.224 |
| rs11681659  | T           | C                     | T          | C                    | 2          | -0.025   | 0.004 | 2.00E-08  | -0.010  | 0.024 | 0.708    | 12.215  |
| rs11895352  | T           | C                     | T          | C                    | 2          | -0.021   | 0.004 | 1.50E-08  | -0.002  | 0.022 | 0.980    | 13.103  |
| rs1260326   | C           | T                     | C          | T                    | 2          | -0.082   | 0.004 | 8.40E-88  | -0.050  | 0.023 | 0.041    | 179.233 |
| rs13332426  | C           | G                     | C          | G                    | 16         | 0.040    | 0.004 | 3.80E-21  | 0.022   | 0.026 | 0.360    | 40.020  |
| rs13424225  | T           | G                     | T          | G                    | 2          | 0.022    | 0.004 | 2.20E-08  | -0.009  | 0.023 | 0.636    | 13.912  |
| rs142158911 | A           | G                     | A          | G                    | 19         | -0.046   | 0.006 | 7.20E-13  | -0.069  | 0.037 | 0.064    | 10.144  |

|            |   |   |   |   |    |        |       |           |        |       |       |          |
|------------|---|---|---|---|----|--------|-------|-----------|--------|-------|-------|----------|
| rs16940904 | T | C | T | C | 17 | -0.036 | 0.005 | 3.90E-14  | -0.002 | 0.026 | 0.868 | 17.826   |
| rs174528   | C | T | C | T | 11 | -0.310 | 0.004 | 1.00E-200 | 0.073  | 0.023 | 0.002 | 2533.620 |
| rs2131925  | T | G | T | G | 1  | 0.071  | 0.004 | 1.20E-66  | 0.006  | 0.023 | 0.767 | 123.662  |
| rs2229738  | T | C | T | C | 11 | -0.124 | 0.008 | 4.50E-55  | 0.078  | 0.052 | 0.124 | 27.363   |
| rs2394976  | T | G | T | G | 6  | -0.046 | 0.006 | 1.20E-15  | -0.066 | 0.034 | 0.058 | 18.229   |
| rs261291   | C | T | C | T | 15 | 0.113  | 0.004 | 1.70E-161 | -0.013 | 0.024 | 0.663 | 314.247  |
| rs28607776 | G | A | G | A | 15 | -0.075 | 0.006 | 9.00E-38  | 0.046  | 0.034 | 0.285 | 33.441   |
| rs34707604 | C | T | C | T | 4  | 0.046  | 0.005 | 1.90E-21  | 0.017  | 0.034 | 0.637 | 32.497   |
| rs4000713  | A | G | A | G | 7  | -0.029 | 0.004 | 1.00E-11  | -0.036 | 0.025 | 0.147 | 16.657   |
| rs429358   | C | T | C | T | 19 | 0.036  | 0.006 | 1.60E-11  | -0.024 | 0.034 | 0.500 | 10.114   |
| rs4418728  | T | G | T | G | 10 | -0.024 | 0.004 | 5.60E-10  | 0.009  | 0.023 | 0.644 | 17.047   |
| rs4704834  | G | A | G | A | 5  | 0.029  | 0.004 | 1.70E-13  | -0.009 | 0.023 | 0.707 | 20.513   |
| rs472031   | A | G | A | G | 11 | 0.103  | 0.007 | 4.20E-48  | -0.093 | 0.039 | 0.023 | 34.589   |
| rs4775038  | T | C | T | C | 15 | -0.056 | 0.007 | 5.60E-17  | 0.024  | 0.037 | 0.586 | 12.602   |
| rs5112     | G | C | G | C | 19 | 0.048  | 0.004 | 9.10E-30  | -0.024 | 0.028 | 0.442 | 56.777   |
| rs5167     | G | T | G | T | 19 | 0.035  | 0.004 | 6.00E-16  | 0.030  | 0.024 | 0.216 | 29.852   |
| rs55891451 | C | A | C | A | 10 | 0.034  | 0.005 | 4.60E-12  | -0.006 | 0.028 | 0.813 | 13.974   |

|             |   |   |   |   |    |        |       |           |        |       |       |         |
|-------------|---|---|---|---|----|--------|-------|-----------|--------|-------|-------|---------|
| rs55938136  | G | A | G | A | 17 | -0.033 | 0.005 | 1.80E-12  | -0.003 | 0.045 | 0.963 | 15.264  |
| rs564794849 | G | T | G | T | 6  | 0.032  | 0.005 | 6.00E-10  | -0.007 | 0.030 | 0.843 | 15.879  |
| rs58542926  | T | C | T | C | 19 | -0.172 | 0.008 | 1.40E-113 | -0.045 | 0.043 | 0.241 | 64.745  |
| rs6129624   | A | G | A | G | 20 | -0.026 | 0.004 | 5.10E-10  | 0.033  | 0.024 | 0.156 | 14.780  |
| rs62466318  | T | C | T | C | 7  | -0.072 | 0.005 | 1.20E-45  | 0.001  | 0.028 | 0.962 | 63.233  |
| rs629301    | T | G | T | G | 1  | 0.038  | 0.005 | 1.30E-14  | 0.007  | 0.027 | 0.955 | 20.348  |
| rs668948    | A | G | A | G | 2  | 0.046  | 0.005 | 1.10E-19  | 0.001  | 0.029 | 0.997 | 21.295  |
| rs6693447   | G | T | G | T | 1  | 0.023  | 0.004 | 4.80E-09  | -0.012 | 0.023 | 0.574 | 15.089  |
| rs673335    | C | T | C | T | 11 | -0.067 | 0.006 | 1.10E-34  | -0.018 | 0.029 | 0.624 | 37.623  |
| rs7115739   | G | T | G | T | 11 | 0.221  | 0.013 | 1.50E-71  | -0.088 | 0.062 | 0.128 | 15.591  |
| rs72789541  | A | T | A | T | 16 | -0.081 | 0.004 | 5.60E-75  | -0.002 | 0.024 | 0.883 | 132.171 |
| rs740004    | T | C | T | C | 11 | -0.062 | 0.005 | 8.90E-37  | 0.040  | 0.027 | 0.137 | 49.439  |
| rs7924036   | T | G | T | G | 10 | 0.023  | 0.004 | 5.50E-10  | 0.016  | 0.022 | 0.366 | 15.818  |
| rs7970695   | A | G | A | G | 12 | -0.025 | 0.004 | 1.20E-10  | 0.017  | 0.023 | 0.455 | 16.415  |
| rs964184    | C | G | C | G | 11 | -0.117 | 0.006 | 8.90E-87  | 0.036  | 0.032 | 0.258 | 84.441  |
| rs9947684   | G | A | G | A | 18 | 0.042  | 0.004 | 7.40E-25  | 0.008  | 0.024 | 0.690 | 42.598  |
| rs9953984   | C | T | C | T | 18 | 0.026  | 0.004 | 7.20E-10  | -0.010 | 0.024 | 0.631 | 15.592  |



|           |   |   |   |   |    |       |       |          |       |       |       |        |
|-----------|---|---|---|---|----|-------|-------|----------|-------|-------|-------|--------|
| rs9963974 | A | T | A | T | 18 | 0.031 | 0.004 | 3.90E-12 | 0.053 | 0.023 | 0.025 | 20.709 |
| rs9987289 | G | A | G | A | 8  | 0.057 | 0.007 | 3.20E-16 | 0.015 | 0.040 | 0.569 | 10.177 |

SE: Standard Error.

**Table S2.** Univariate Mendelian Randomization Harmonized Dataset and Strength Assessment of the Effects of Omega-6 Fatty Acids on Bipolar Disorder.

| SNP             | Other allele exposure | EA outcome | Other allele outcome | Chromosome | Exposure |       |           | Outcome |       |       | F       |
|-----------------|-----------------------|------------|----------------------|------------|----------|-------|-----------|---------|-------|-------|---------|
|                 |                       |            |                      |            | $\beta$  | SE    | $p$       | $\beta$ | SE    | $p$   |         |
| rs1002687       | G                     | A          | G                    | 1          | 0.091    | 0.004 | 1.00E-107 | 0.004   | 0.023 | 0.854 | 205.079 |
| rs10455872      | A                     | G          | A                    | 6          | -0.080   | 0.007 | 2.50E-27  | 0.078   | 0.047 | 0.069 | 15.803  |
| rs1065853       | G                     | T          | G                    | 19         | -0.199   | 0.007 | 3.60E-160 | 0.072   | 0.045 | 0.137 | 101.357 |
| rs1077835       | A                     | G          | A                    | 15         | 0.101    | 0.005 | 6.30E-96  | 0.008   | 0.028 | 0.773 | 141.789 |
| rs11071373      | A                     | G          | A                    | 15         | -0.032   | 0.005 | 3.20E-10  | -0.003  | 0.029 | 0.778 | 11.898  |
| rs11239588      | A                     | G          | A                    | 10         | 0.029    | 0.005 | 1.70E-10  | -0.011  | 0.026 | 0.636 | 14.723  |
| rs11287565<br>1 | G                     | A          | G                    | 8          | -0.064   | 0.004 | 2.20E-53  | 0.018   | 0.023 | 0.339 | 105.779 |
| rs11547873<br>5 | A                     | T          | A                    | 9          | 0.042    | 0.005 | 2.20E-17  | 0.007   | 0.028 | 0.612 | 18.850  |
| rs11789603      | C                     | T          | C                    | 9          | 0.048    | 0.006 | 9.70E-14  | -0.003  | 0.036 | 0.863 | 10.116  |
| rs1260326       | T                     | C          | T                    | 2          | -0.064   | 0.004 | 3.90E-55  | -0.050  | 0.023 | 0.041 | 111.508 |

|                 |   |   |   |    |        |       |           |        |       |       |         |
|-----------------|---|---|---|----|--------|-------|-----------|--------|-------|-------|---------|
| rs12740374      | G | T | G | 1  | -0.057 | 0.005 | 1.50E-32  | -0.008 | 0.027 | 0.912 | 45.959  |
| rs13108218      | A | G | A | 4  | -0.035 | 0.004 | 3.60E-18  | -0.015 | 0.024 | 0.523 | 32.179  |
| rs14215891<br>1 | G | A | G | 19 | -0.094 | 0.006 | 5.20E-52  | -0.069 | 0.037 | 0.064 | 44.130  |
| rs1461729       | A | G | A | 8  | 0.084  | 0.007 | 2.80E-36  | 0.018  | 0.038 | 0.531 | 26.964  |
| rs157595        | A | G | A | 19 | 0.069  | 0.004 | 8.90E-61  | -0.028 | 0.026 | 0.284 | 121.243 |
| rs1672907       | G | A | G | 12 | -0.026 | 0.004 | 5.80E-11  | -0.002 | 0.022 | 0.920 | 19.079  |
| rs183130        | C | T | C | 16 | 0.062  | 0.004 | 1.40E-48  | 0.034  | 0.024 | 0.156 | 85.537  |
| rs2065397       | G | A | G | 6  | -0.030 | 0.004 | 1.70E-13  | -0.004 | 0.023 | 0.787 | 23.165  |
| rs2179372       | C | G | C | 20 | 0.024  | 0.004 | 7.10E-10  | -0.005 | 0.022 | 0.876 | 16.861  |
| rs219548        | A | C | A | 2  | -0.029 | 0.004 | 3.40E-11  | -0.071 | 0.024 | 0.003 | 17.830  |
| rs2241212       | T | A | T | 12 | 0.024  | 0.004 | 8.60E-10  | -0.008 | 0.022 | 0.687 | 16.181  |
| rs261290        | T | C | T | 15 | -0.097 | 0.004 | 1.00E-116 | 0.011  | 0.024 | 0.762 | 223.988 |
| rs2740488       | A | C | A | 9  | -0.050 | 0.005 | 5.40E-28  | 0.046  | 0.025 | 0.091 | 44.799  |
| rs28383314      | T | C | T | 6  | 0.039  | 0.004 | 1.70E-18  | 0.008  | 0.023 | 0.695 | 39.289  |
| rs28607776      | A | G | A | 15 | -0.074 | 0.006 | 3.80E-35  | 0.046  | 0.034 | 0.285 | 32.641  |
| rs2986164       | G | A | G | 1  | -0.025 | 0.004 | 3.40E-09  | 0.049  | 0.025 | 0.044 | 15.333  |

|            |   |   |   |    |        |       |          |        |       |       |        |
|------------|---|---|---|----|--------|-------|----------|--------|-------|-------|--------|
| rs34121855 | T | G | T | 7  | -0.050 | 0.005 | 1.40E-22 | 0.002  | 0.028 | 0.973 | 30.345 |
| rs35106244 | C | T | C | 19 | 0.024  | 0.004 | 7.30E-09 | 0.027  | 0.025 | 0.362 | 16.050 |
| rs3770586  | C | T | C | 2  | -0.023 | 0.004 | 7.10E-09 | 0.010  | 0.023 | 0.754 | 15.384 |
| rs3817335  | T | A | T | 11 | -0.028 | 0.004 | 9.80E-12 | -0.019 | 0.023 | 0.391 | 18.936 |
| rs4008004  | C | A | C | 9  | 0.033  | 0.005 | 8.40E-12 | -0.041 | 0.027 | 0.149 | 15.123 |
| rs4149307  | C | T | C | 9  | 0.039  | 0.006 | 6.00E-13 | -0.002 | 0.031 | 0.964 | 12.510 |
| rs4252125  | G | A | G | 6  | 0.025  | 0.004 | 2.40E-09 | 0.038  | 0.024 | 0.107 | 12.259 |
| rs4299376  | G | T | G | 2  | -0.035 | 0.004 | 1.10E-16 | 0.007  | 0.025 | 0.827 | 28.171 |
| rs4439799  | C | T | C | 17 | 0.022  | 0.004 | 1.30E-08 | 0.048  | 0.022 | 0.020 | 14.721 |
| rs4605275  | T | C | T | 19 | 0.034  | 0.004 | 4.20E-15 | -0.037 | 0.025 | 0.124 | 24.378 |
| rs4704210  | G | C | G | 5  | 0.047  | 0.004 | 6.10E-30 | -0.009 | 0.023 | 0.600 | 56.447 |
| rs4766578  | T | A | T | 12 | 0.028  | 0.004 | 1.50E-12 | -0.020 | 0.022 | 0.432 | 22.644 |
| rs4860948  | T | A | T | 4  | 0.028  | 0.005 | 1.90E-09 | 0.009  | 0.033 | 0.835 | 12.440 |
| rs486142   | G | A | G | 1  | 0.030  | 0.004 | 2.90E-15 | -0.004 | 0.022 | 0.858 | 27.171 |
| rs4876611  | A | G | A | 8  | 0.028  | 0.004 | 7.30E-10 | -0.021 | 0.025 | 0.389 | 14.786 |
| rs4921913  | C | T | C | 8  | -0.028 | 0.005 | 1.10E-08 | -0.004 | 0.026 | 0.946 | 10.833 |
| rs57465754 | C | G | C | 19 | 0.044  | 0.005 | 1.30E-18 | 0.012  | 0.027 | 0.615 | 23.810 |

|            |   |   |   |    |        |       |           |        |       |       |         |
|------------|---|---|---|----|--------|-------|-----------|--------|-------|-------|---------|
| rs5754102  | C | A | C | 22 | -0.032 | 0.005 | 9.90E-10  | -0.012 | 0.029 | 0.450 | 10.297  |
| rs58542926 | C | T | C | 19 | -0.128 | 0.008 | 2.50E-65  | -0.045 | 0.043 | 0.241 | 36.621  |
| rs6471717  | G | A | G | 8  | -0.029 | 0.004 | 4.00E-12  | -0.032 | 0.023 | 0.175 | 19.722  |
| rs6602911  | C | T | C | 13 | 0.026  | 0.004 | 1.30E-09  | 0.030  | 0.025 | 0.298 | 16.598  |
| rs6882345  | G | A | G | 5  | 0.045  | 0.004 | 1.20E-27  | -0.008 | 0.023 | 0.748 | 51.380  |
| rs693      | G | A | G | 2  | 0.060  | 0.004 | 3.80E-52  | 0.049  | 0.022 | 0.028 | 105.015 |
| rs6934962  | C | T | C | 6  | 0.023  | 0.004 | 2.20E-08  | 0.041  | 0.023 | 0.059 | 14.179  |
| rs7139079  | G | A | G | 12 | -0.030 | 0.004 | 3.30E-13  | 0.006  | 0.023 | 0.785 | 24.168  |
| rs7831074  | C | G | C | 8  | 0.028  | 0.005 | 4.60E-08  | 0.039  | 0.028 | 0.136 | 10.661  |
| rs907866   | G | A | G | 2  | -0.038 | 0.004 | 2.60E-21  | -0.002 | 0.022 | 0.945 | 40.612  |
| rs9269386  | G | A | G | 6  | 0.039  | 0.005 | 2.10E-14  | 0.043  | 0.028 | 0.137 | 28.997  |
| rs9304381  | C | T | C | 18 | 0.070  | 0.005 | 7.20E-42  | -0.004 | 0.030 | 0.966 | 51.266  |
| rs9616847  | A | T | A | 22 | 0.024  | 0.004 | 1.40E-08  | 0.026  | 0.023 | 0.198 | 14.940  |
| rs964184   | G | C | G | 11 | -0.139 | 0.006 | 1.10E-125 | 0.036  | 0.032 | 0.258 | 120.621 |

SE: Standard Error.

**Table S3.** Univariate Mendelian Randomization Harmonized Dataset and Strength Assessment of the Effects of Omega-6/Omega-3 Fatty Acids on Bipolar Disorder.

| SNP             | EA exposure | Other allele exposure | EA outcome | Other allele outcome | Chromosome | Exposure |       |          | Outcome |       |       | F       |
|-----------------|-------------|-----------------------|------------|----------------------|------------|----------|-------|----------|---------|-------|-------|---------|
|                 |             |                       |            |                      |            | $\beta$  | SE    | $p$      | $\beta$ | SE    | $p$   |         |
| rs1065853       | T           | G                     | T          | G                    | 19         | -0.079   | 0.008 | 1.20E-26 | 0.072   | 0.045 | 0.137 | 15.629  |
| rs10733306      | T           | C                     | T          | C                    | 9          | 0.023    | 0.004 | 3.20E-08 | 0.071   | 0.022 | 0.001 | 14.166  |
| rs1077835       | G           | A                     | G          | A                    | 15         | -0.100   | 0.005 | 1.60E-94 | 0.008   | 0.028 | 0.773 | 134.235 |
| rs10897232      | T           | C                     | T          | C                    | 11         | -0.054   | 0.005 | 2.90E-33 | -0.023  | 0.025 | 0.347 | 55.055  |
| rs11242109      | T           | G                     | T          | G                    | 5          | -0.024   | 0.004 | 1.40E-09 | -0.011  | 0.022 | 0.550 | 16.449  |
| rs11287565<br>1 | A           | G                     | A          | G                    | 8          | 0.072    | 0.004 | 6.50E-65 | 0.018   | 0.023 | 0.339 | 131.024 |

|                 |   |   |   |   |    |        |       |           |        |       |       |              |
|-----------------|---|---|---|---|----|--------|-------|-----------|--------|-------|-------|--------------|
| rs1260326       | C | T | C | T | 2  | 0.065  | 0.004 | 4.20E-55  | -0.050 | 0.023 | 0.041 | 112.575      |
| rs13263508      | T | G | T | G | 8  | 0.022  | 0.004 | 2.80E-08  | -0.007 | 0.023 | 0.746 | 14.217       |
| rs13332426      | C | G | C | G | 16 | -0.041 | 0.004 | 4.50E-22  | 0.022  | 0.026 | 0.360 | 42.634       |
| rs174528        | C | T | C | T | 11 | 0.341  | 0.004 | 1.00E-200 | 0.073  | 0.023 | 0.002 | 3057.49<br>9 |
| rs19092161<br>1 | A | G | A | G | 19 | -0.031 | 0.005 | 6.80E-11  | 0.019  | 0.026 | 0.458 | 17.815       |
| rs2229738       | T | C | T | C | 11 | 0.134  | 0.008 | 8.10E-62  | 0.078  | 0.052 | 0.124 | 31.596       |
| rs261291        | C | T | C | T | 15 | -0.089 | 0.004 | 9.90E-99  | -0.013 | 0.024 | 0.663 | 191.390      |
| rs28607776      | G | A | G | A | 15 | 0.054  | 0.006 | 2.30E-20  | 0.046  | 0.034 | 0.285 | 16.871       |
| rs34707604      | C | T | C | T | 4  | -0.042 | 0.005 | 9.20E-18  | 0.017  | 0.034 | 0.637 | 27.230       |

|            |   |   |   |   |    |        |       |          |        |       |       |        |
|------------|---|---|---|---|----|--------|-------|----------|--------|-------|-------|--------|
| rs4000713  | A | G | A | G | 7  | 0.031  | 0.004 | 6.10E-13 | -0.036 | 0.025 | 0.147 | 18.906 |
| rs4418728  | T | G | T | G | 10 | 0.024  | 0.004 | 1.70E-09 | 0.009  | 0.023 | 0.644 | 16.867 |
| rs472031   | A | G | A | G | 11 | -0.113 | 0.007 | 1.20E-56 | -0.093 | 0.039 | 0.023 | 40.770 |
| rs55938136 | G | A | G | A | 17 | 0.039  | 0.005 | 7.80E-17 | -0.003 | 0.045 | 0.963 | 21.388 |
| rs56233220 | C | G | C | G | 10 | -0.036 | 0.005 | 1.10E-12 | -0.002 | 0.028 | 0.926 | 14.824 |
| rs58542926 | T | C | T | C | 19 | 0.143  | 0.008 | 3.40E-79 | -0.045 | 0.043 | 0.241 | 44.576 |
| rs600626   | G | A | G | A | 11 | 0.060  | 0.006 | 6.60E-28 | -0.011 | 0.030 | 0.801 | 29.280 |
| rs62466318 | T | C | T | C | 7  | 0.061  | 0.005 | 4.40E-33 | 0.001  | 0.028 | 0.962 | 44.122 |
| rs638714   | T | G | T | G | 1  | 0.044  | 0.004 | 3.70E-25 | -0.009 | 0.024 | 0.680 | 44.883 |



|            |   |   |   |   |    |        |       |          |        |       |       |         |
|------------|---|---|---|---|----|--------|-------|----------|--------|-------|-------|---------|
| rs6698680  | G | A | G | A | 1  | -0.026 | 0.004 | 2.10E-11 | -0.013 | 0.023 | 0.568 | 18.922  |
| rs7115739  | G | T | G | T | 11 | -0.239 | 0.013 | 1.90E-81 | -0.088 | 0.062 | 0.128 | 18.079  |
| rs7222755  | G | A | G | A | 17 | 0.024  | 0.005 | 4.10E-08 | -0.016 | 0.025 | 0.532 | 11.190  |
| rs72789541 | A | T | A | T | 16 | 0.088  | 0.004 | 1.40E-86 | -0.002 | 0.024 | 0.883 | 154.496 |
| rs740004   | T | C | T | C | 11 | 0.067  | 0.005 | 3.00E-42 | 0.040  | 0.027 | 0.137 | 58.090  |
| rs7924036  | T | G | T | G | 10 | -0.029 | 0.004 | 4.70E-14 | 0.016  | 0.022 | 0.366 | 24.882  |
| rs8074191  | C | T | C | T | 17 | 0.028  | 0.005 | 4.80E-09 | -0.014 | 0.026 | 0.701 | 11.975  |
| rs964184   | C | G | C | G | 11 | 0.074  | 0.006 | 5.30E-35 | 0.036  | 0.032 | 0.258 | 33.172  |
| rs9891103  | T | C | T | C | 17 | 0.041  | 0.005 | 2.20E-18 | -0.005 | 0.026 | 0.784 | 23.840  |

|           |   |   |   |   |    |        |       |          |       |       |       |        |
|-----------|---|---|---|---|----|--------|-------|----------|-------|-------|-------|--------|
| rs9947684 | G | A | G | A | 18 | -0.028 | 0.004 | 5.70E-12 | 0.008 | 0.024 | 0.690 | 18.911 |
|-----------|---|---|---|---|----|--------|-------|----------|-------|-------|-------|--------|

SE: Standard Error.

**Table S4.** Calculate power statistics to reflect true cause and effect ( $p < 5e-8$ ).

| <b>Exposure</b>        | <b>Sample size</b> | <b>OR(95%CI, IVW)</b> | <b>R<sup>2</sup> of instrument(%)</b> | <b>Power</b> |
|------------------------|--------------------|-----------------------|---------------------------------------|--------------|
| <b>Omega-3 FA</b>      | 114,999            | 0.884(0.796,0.982)    | 0.057                                 | 0.98         |
| <b>Omega-6 FA</b>      | 114,999            | 1.049(0.902,1.221)    | 0.084                                 | 0.50         |
| <b>Omega-6:Omega-3</b> | 114,999            | 1.172(1.046,1.314)    | 0.054                                 | 1.00         |

IVW: Inverse variance weighting. OR = odds ratio; CI = confidence interval.
