# Supplementary figures and images for: Assessment of causal relationships between omega-3 and omega-6 polyunsaturated fatty acids in bipolar disorder: a 2-sample bidirectional mendelian randomization study
Source: Royal Society of Chemistry journal article supplement (doi:10.1039/d3fo00265a), 2023-01-01

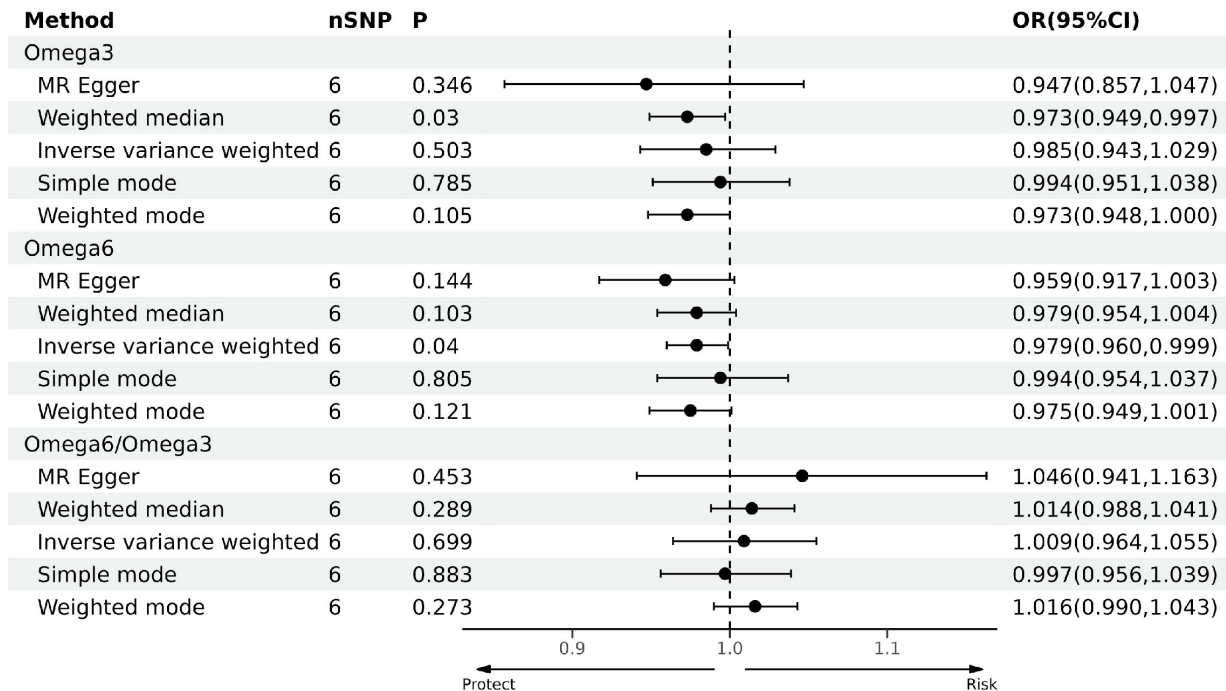

Supplement: d3fo00265a2.pdf [file d3fo00265a2.pdf]

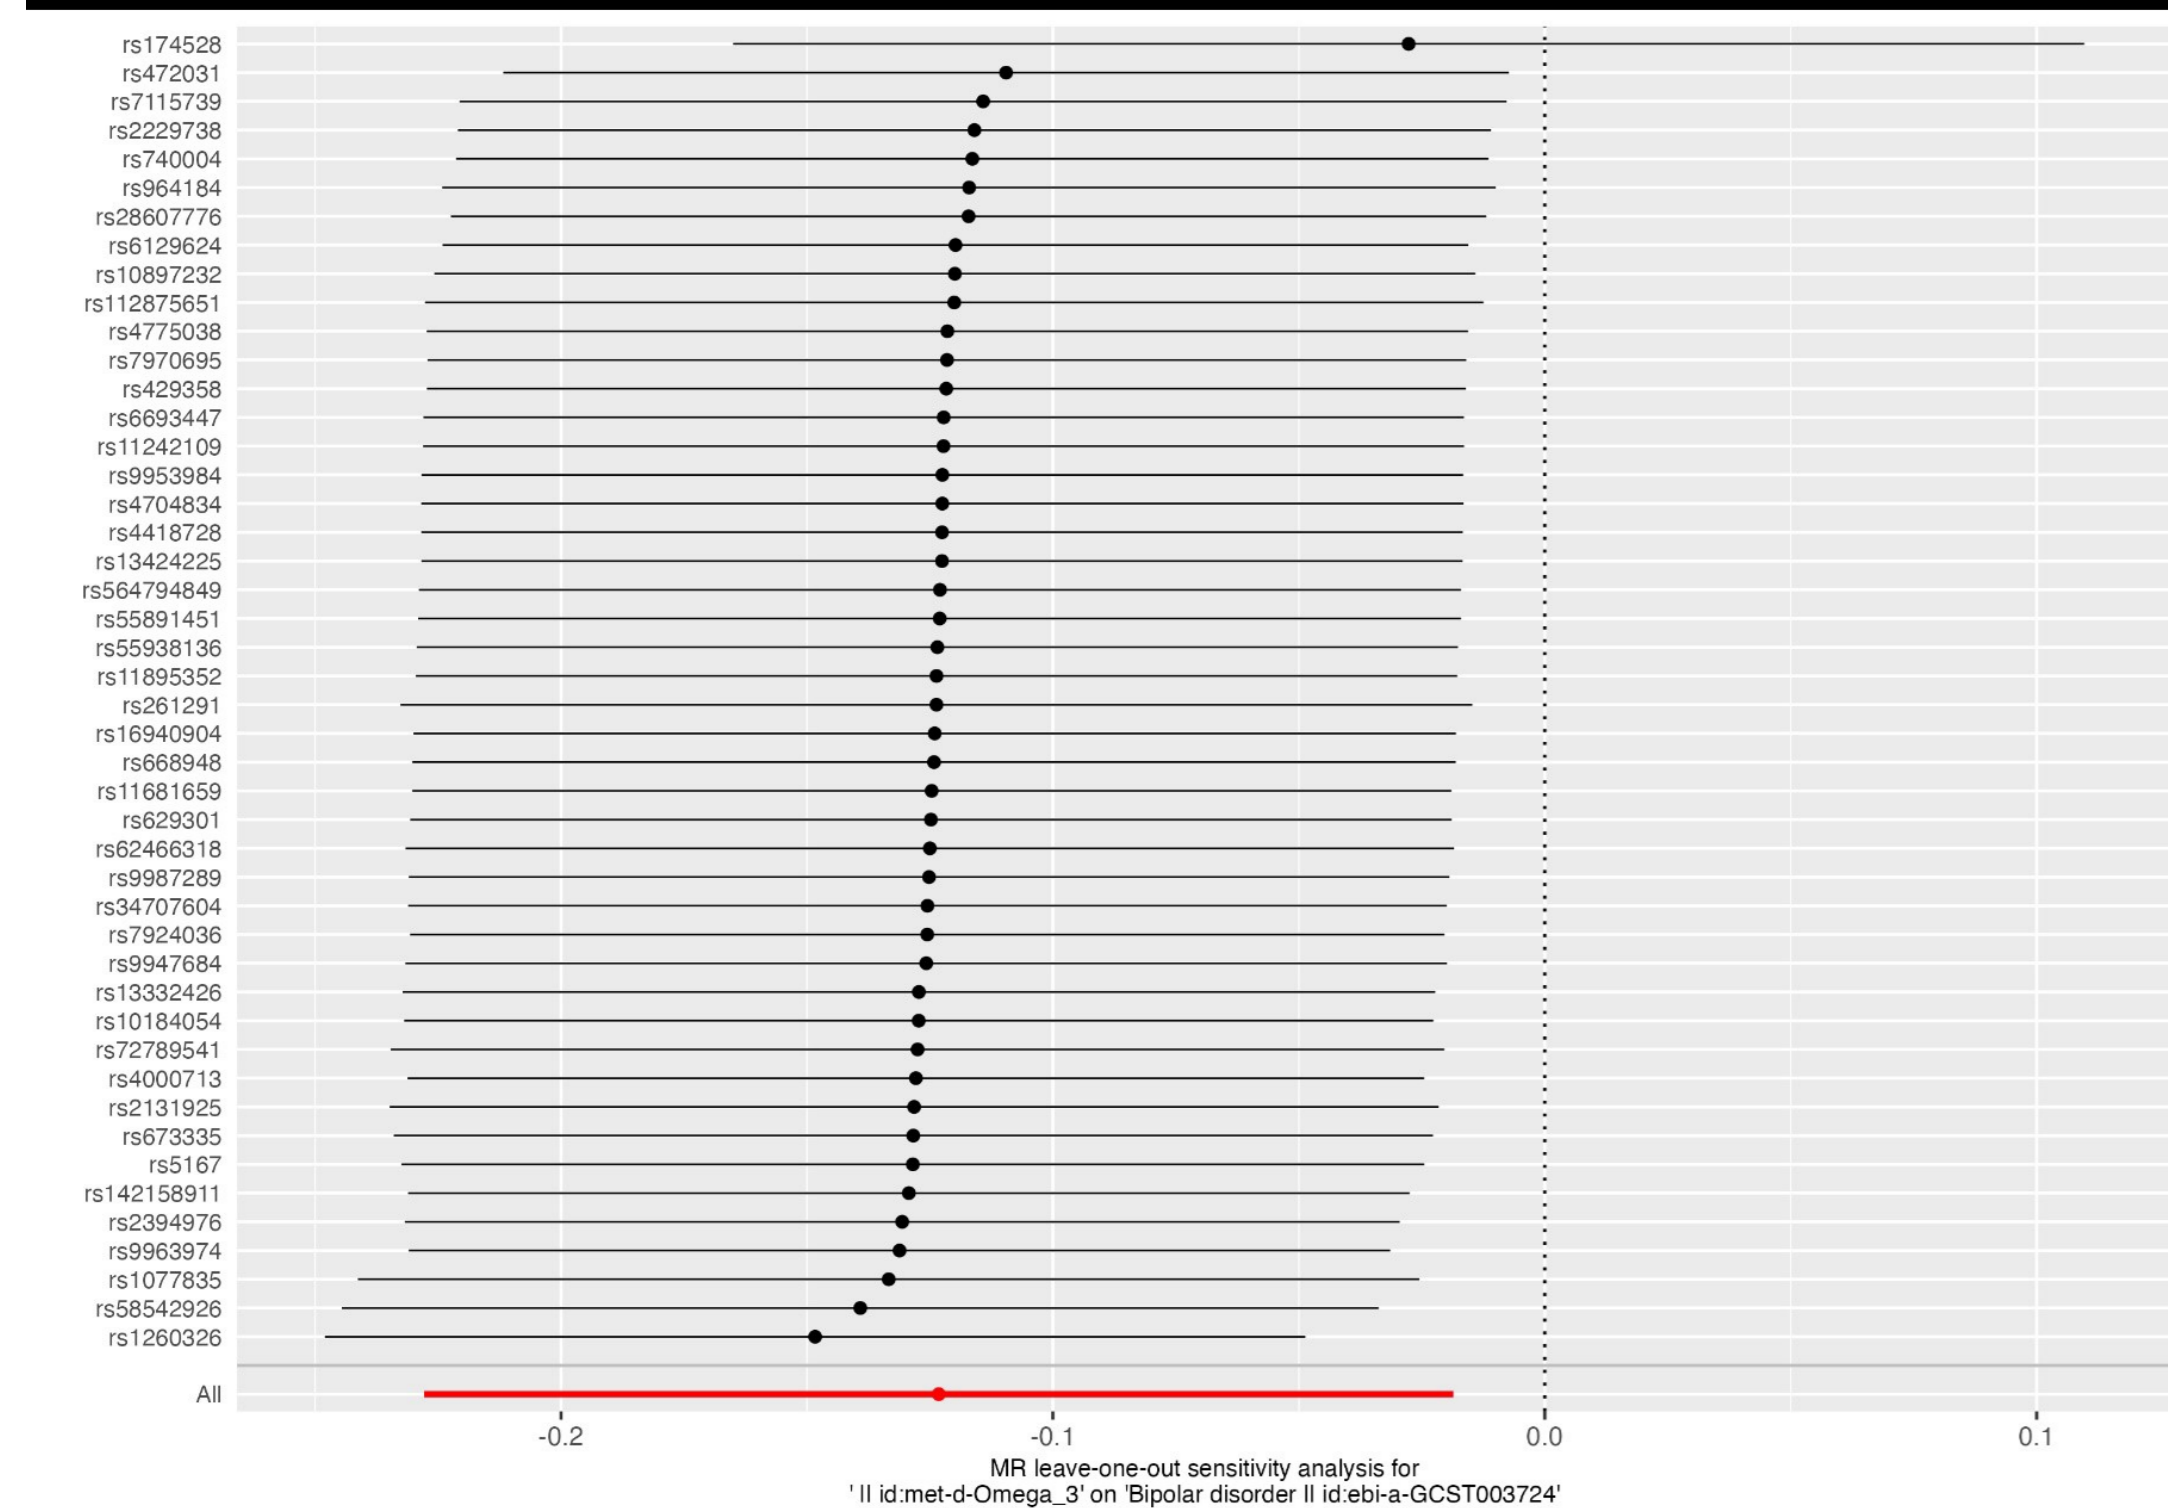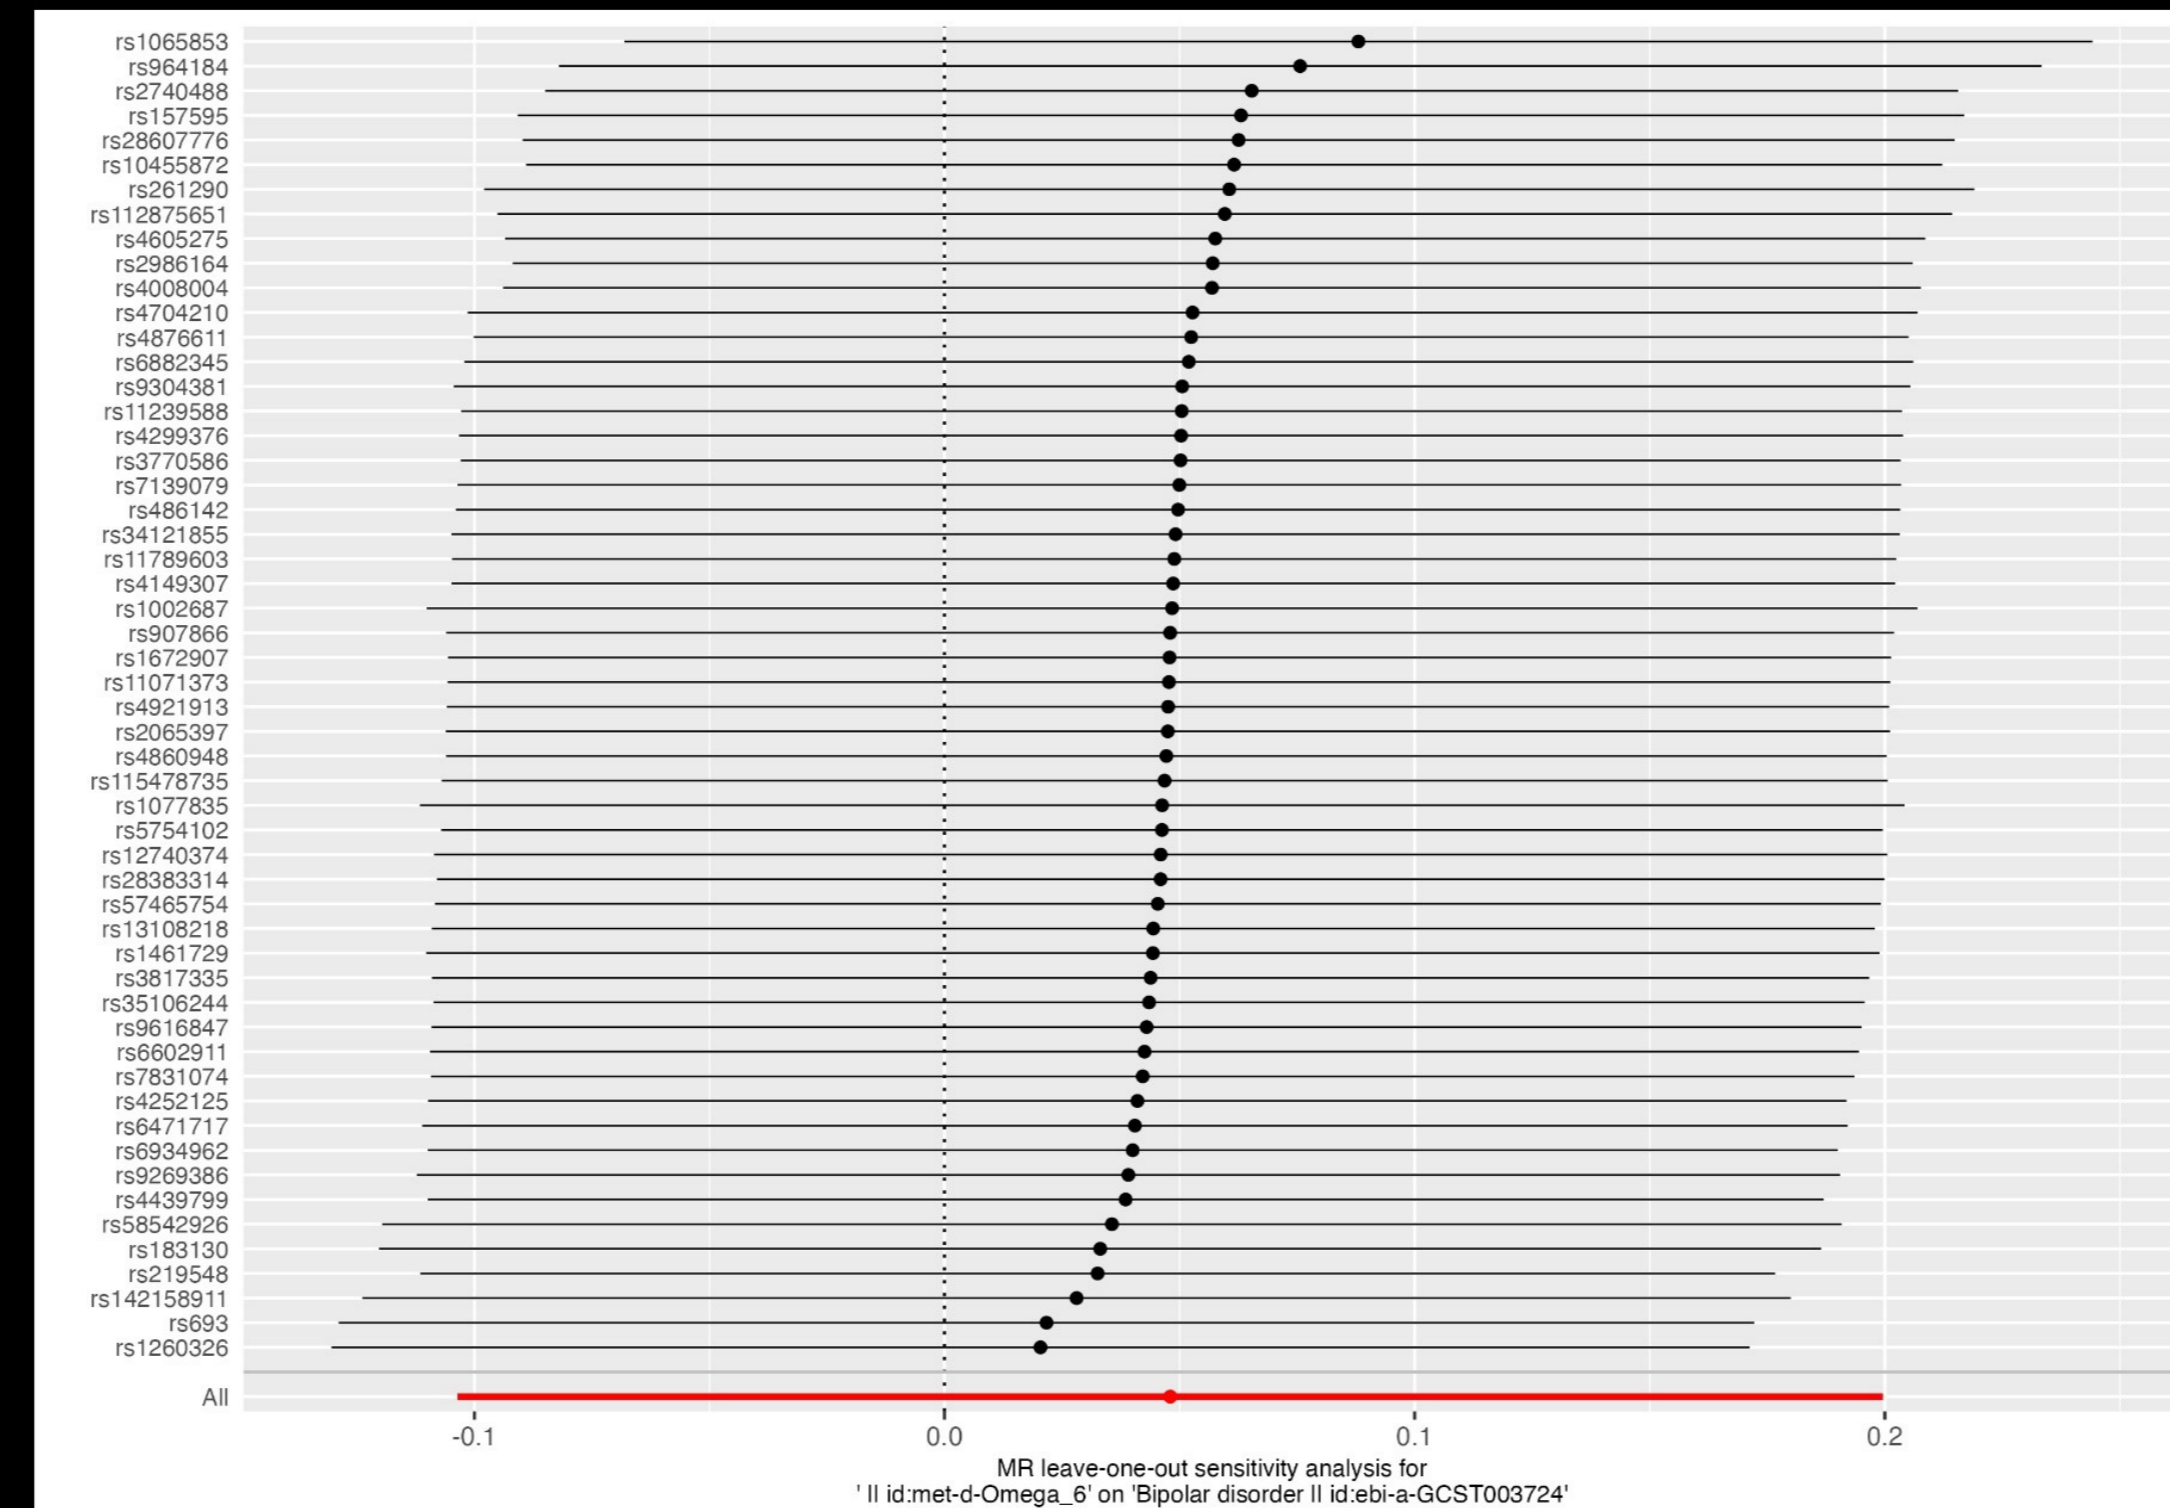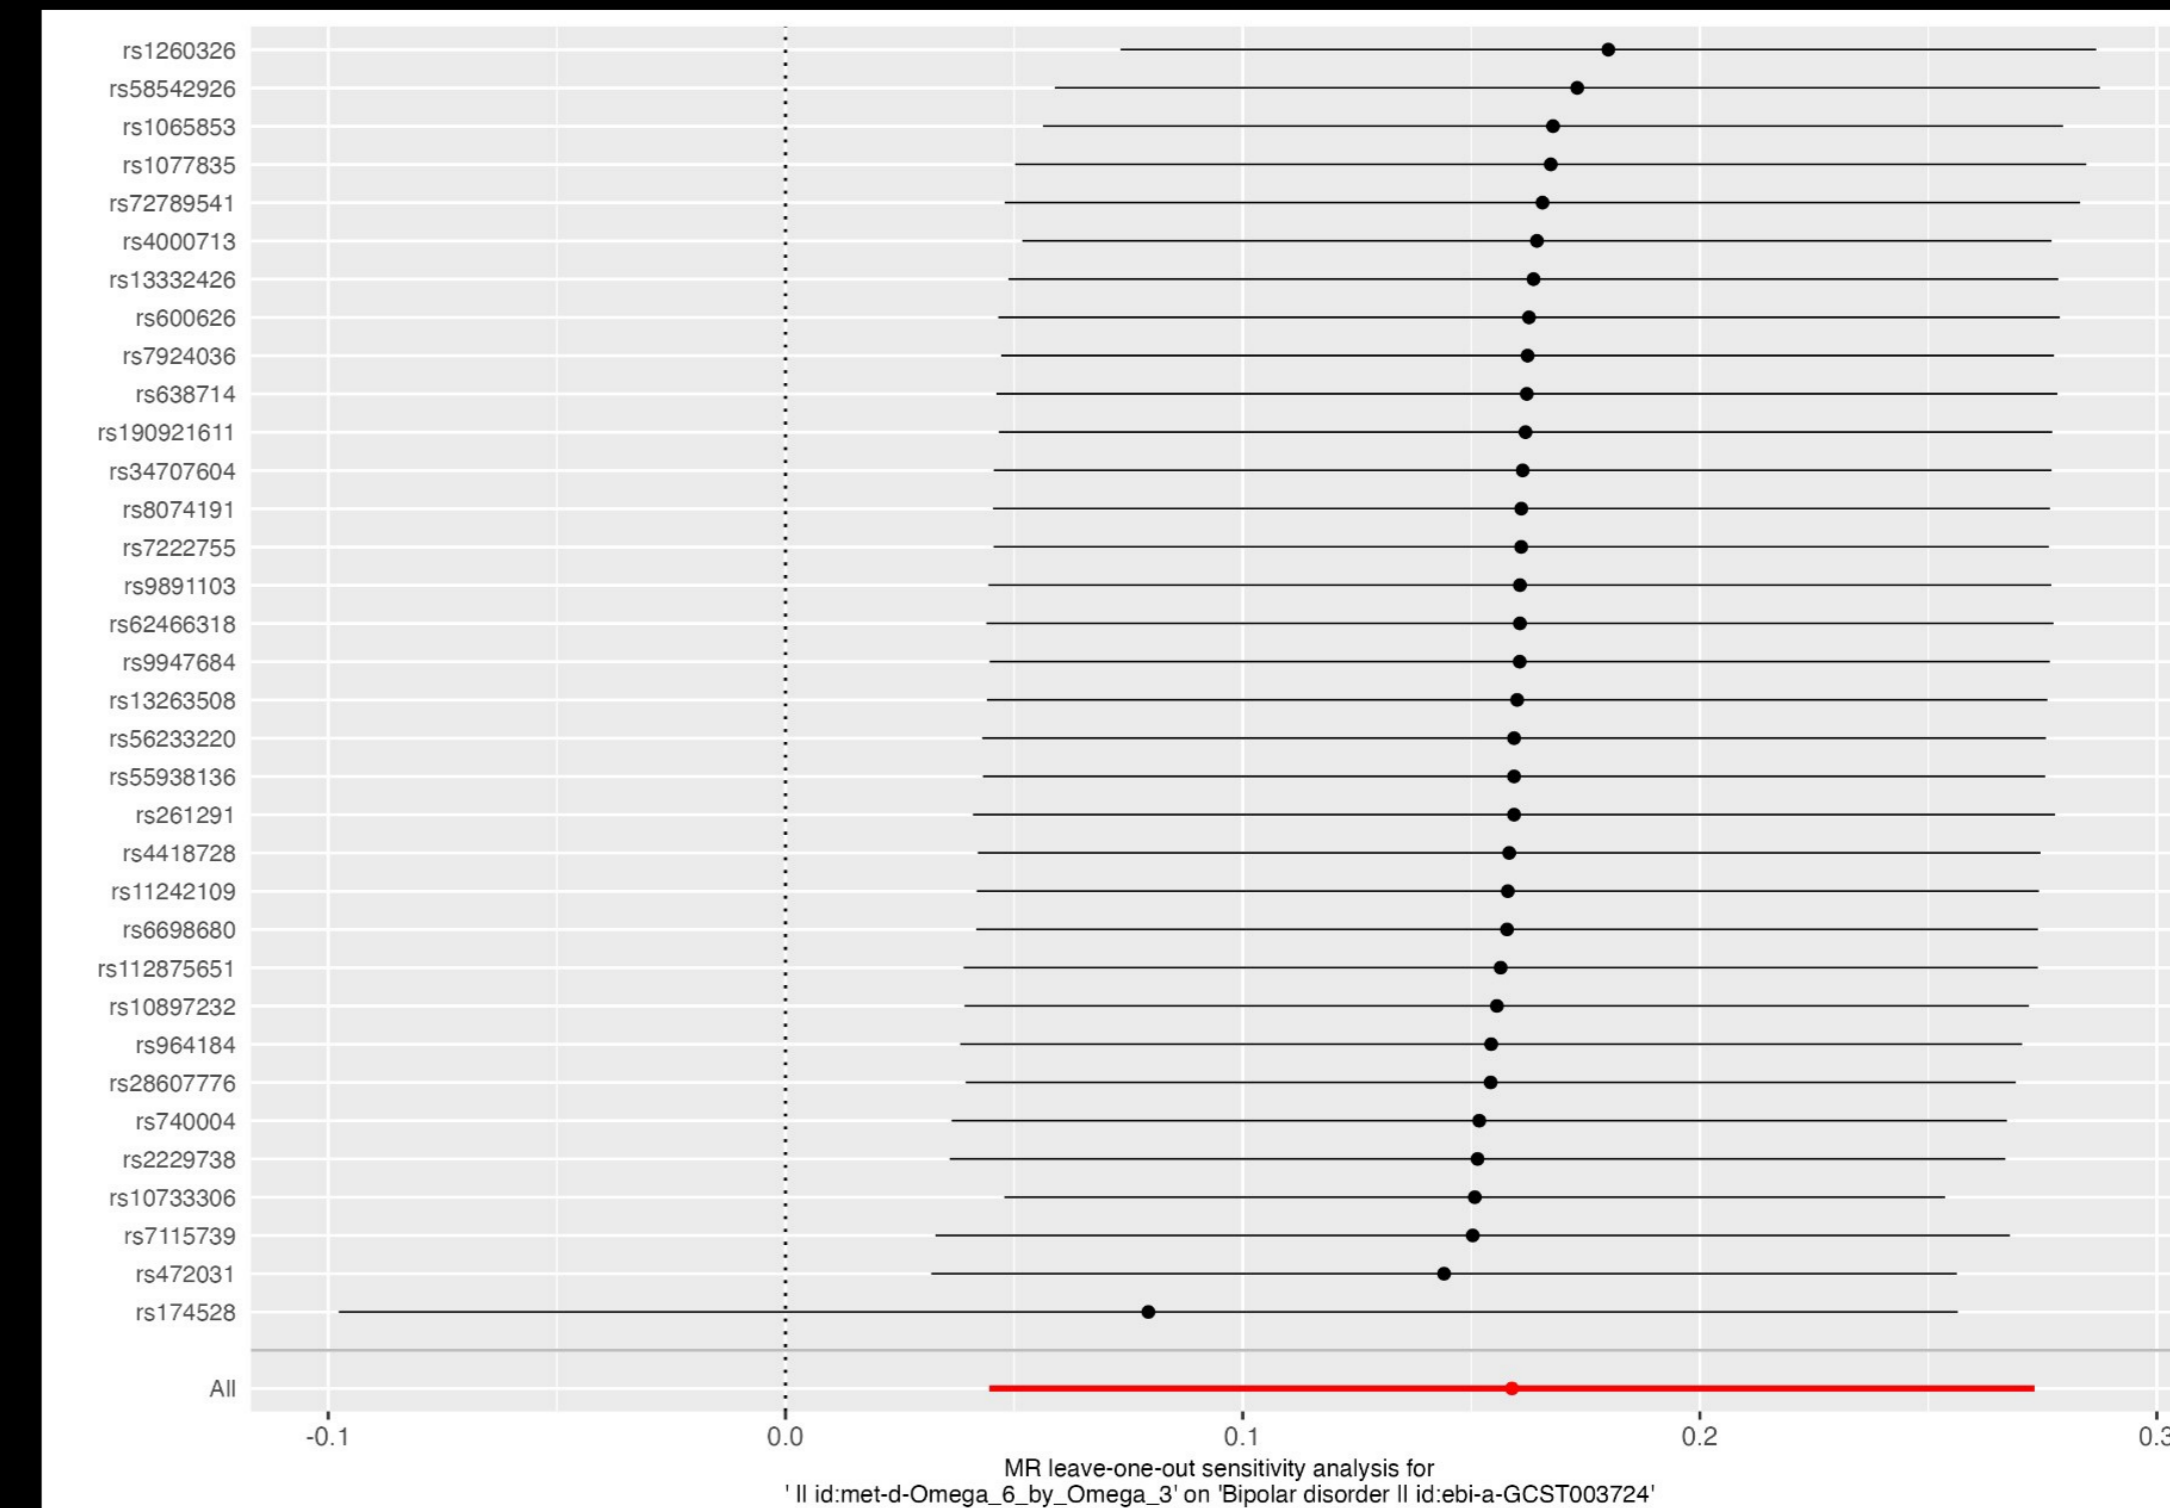

Supplement: d3fo00265a3.pdf [file d3fo00265a3.pdf]
